# Supplementary material for: Liver fibrosis and CD206+ macrophage accumulation are suppressed by anti-GM-CSF therapy
Source: PubMed Central journal article supplement — JHEP Rep. 2019 Dec 6;2(1):100062. doi: 10.1016/j.jhepr.2019.11.006 (PMC7005658; doi:10.1016/j.jhepr.2019.11.006), 2019-12-06
Supplement: mmc1.pdf [file mmc1.pdf]

**Liver fibrosis and CD206<sup>+</sup> macrophage accumulation are suppressed  
by anti-GM-CSF therapy**

Alfonso Tan-Garcia, Fritz Lai, Joe Poh Sheng Yeong, Sergio E. Irac, Pei Y. Ng, Rasha Msallam, Jeffrey Chun Tatt Lim, Lu-En Wai, Christine Y.L. Tham, Su P. Choo, Tony Lim, Dan Y. Young, Roberta D’Ambrosio, Elisabetta Degasperi, Riccardo Perbellini, Evan Newell, Nina Le Bert, Florent Ginhoux, Antonio Bertoletti, Qingfeng Chen, Charles-Antoine Dutertre

Table of contents

Fig. S1.....2  
Fig. S2.....4  
Fig. S3.....5  
Fig. S4.....7  
Table S1.....8  
Table S2.....8

## Supplementary figures

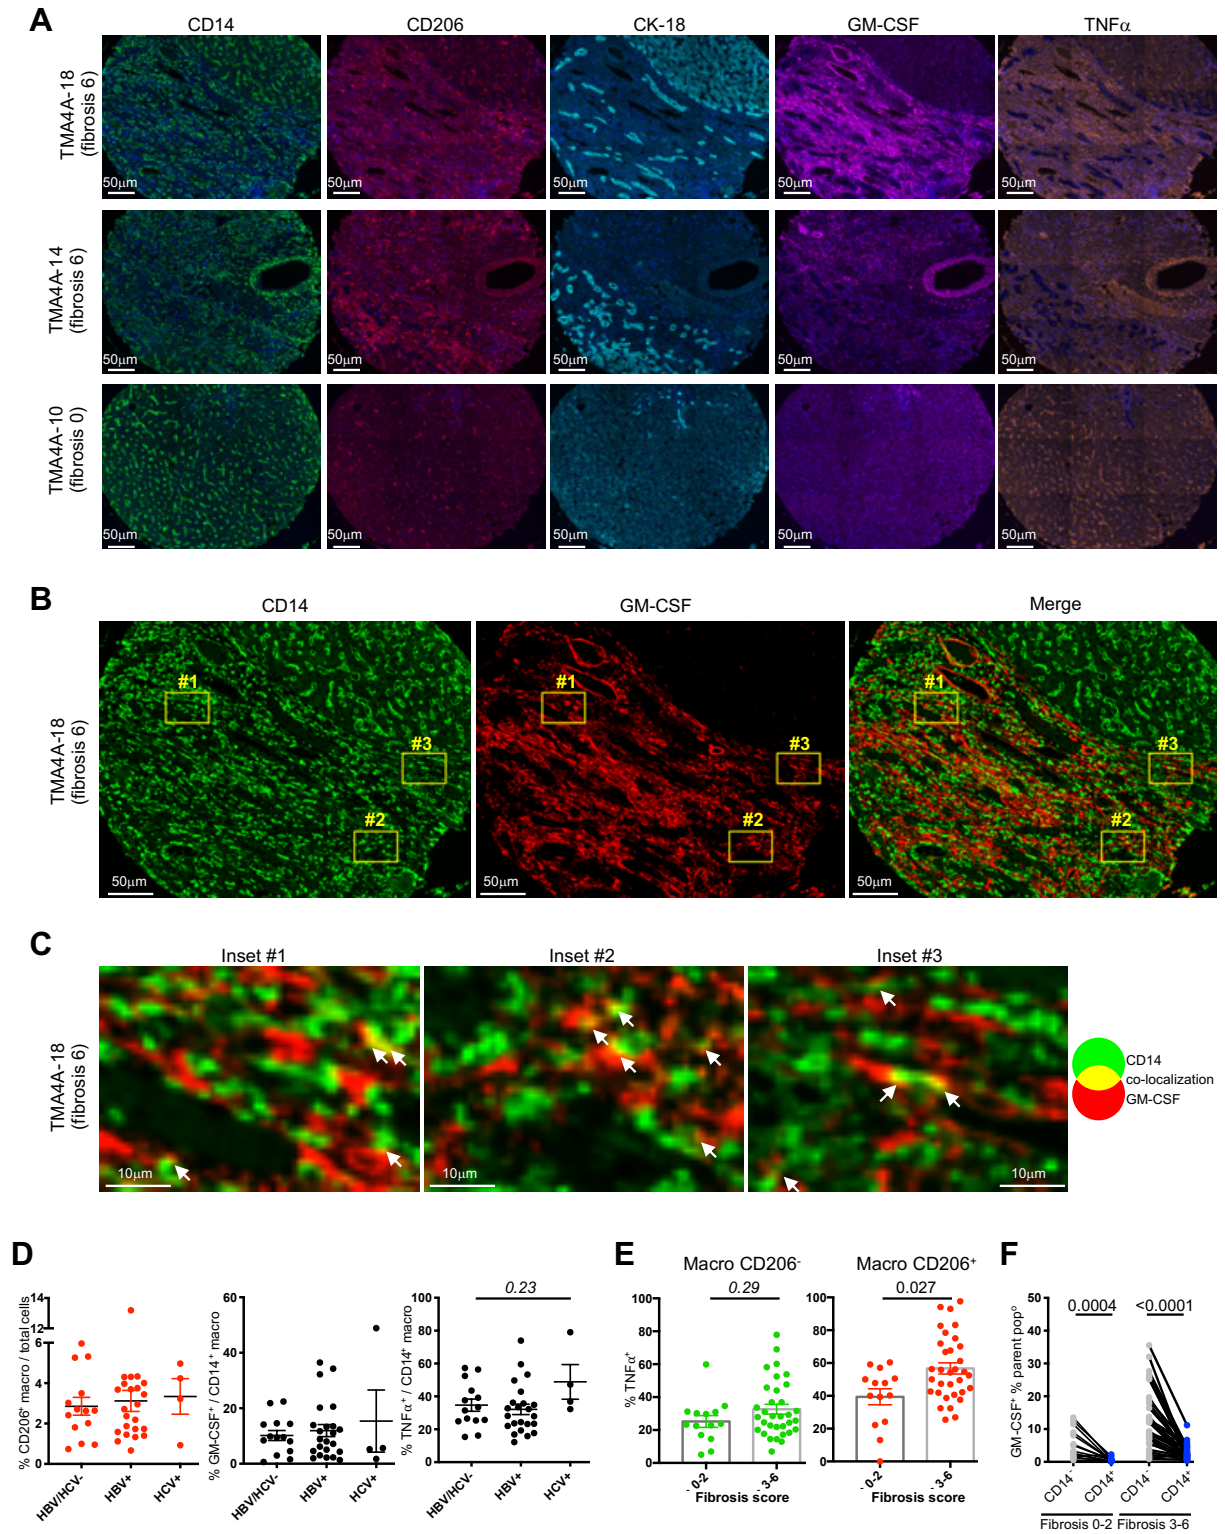

**Fig. S1. (A)** Images of single stainings each with Dapi from immunofluorescence images shown

in **Fig. 1C-E**. Dapi is shown in each single staining image. **(B)** Single stainings images (left and middle panels) and merged image (right panel) of CD14 (green) and GM-CSF (red; displayed in this colour here to obtain yellow when co-localized with green) for TMAA4-18. **(C)** Higher magnifications of insets defined in the merged CD14/GM-CSF image in **(B)** are shown. **(D)** Quantifications of histo-cytometry data showing the proportion of CD206<sup>+</sup> macrophages among total cells (left panel), of GM-CSF<sup>+</sup> cells (middle panel) and of TNF $\alpha$ <sup>+</sup> cells (right panel) among CD14<sup>+</sup> macrophages in HBV<sup>-</sup>/HCV<sup>-</sup>(n=14, HBV<sup>+</sup> (n=23) and HCV<sup>+</sup> (n=4) HCC patients. **(E)** Proportion of TNF $\alpha$ <sup>+</sup> cells among CD206<sup>-</sup> or CD206<sup>+</sup> macrophages in HCC patients split based on fibrosis scores of 0-2 and 3-6. Data displayed as mean +/-SEM, p values calculated by Mann-Whitney test. **(F)** Proportion of GM-CSF<sup>+</sup> cells among CD14<sup>-</sup> or CD14<sup>+</sup> cells in normal adjacent liver of HCC patients split based on fibrosis scores of 0-2 and 3-6. P values were calculated by Wilcoxon test.

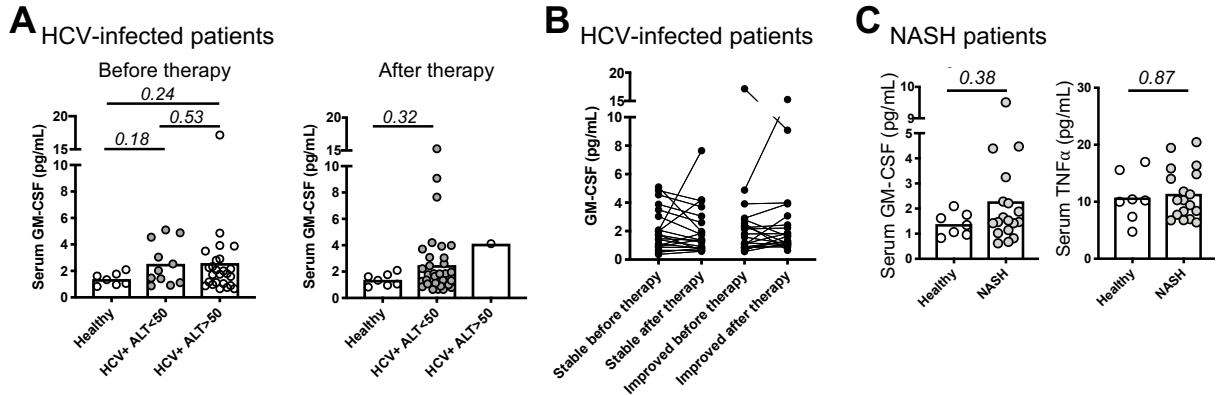

**Fig. S2. (A-B)** Serum GM-CSF concentrations were measured by Luminex in **(A)** healthy human donors (n=7) or CHC patients before (left panel) or after (right panel) DAA therapy with low (<50 IU/L), or high (>50 IU/L) serum ALT. Values are shown as mean concentration (pg/mL). **(B)** Serum GM-CSF concentrations are displayed before and after therapy and patients were separated based on a stable or an improved disease post-therapy. **(C)** Serum GM-CSF concentrations were measured by Luminex in **(A)** healthy human donors (n=7) or NASH patients (n=18).

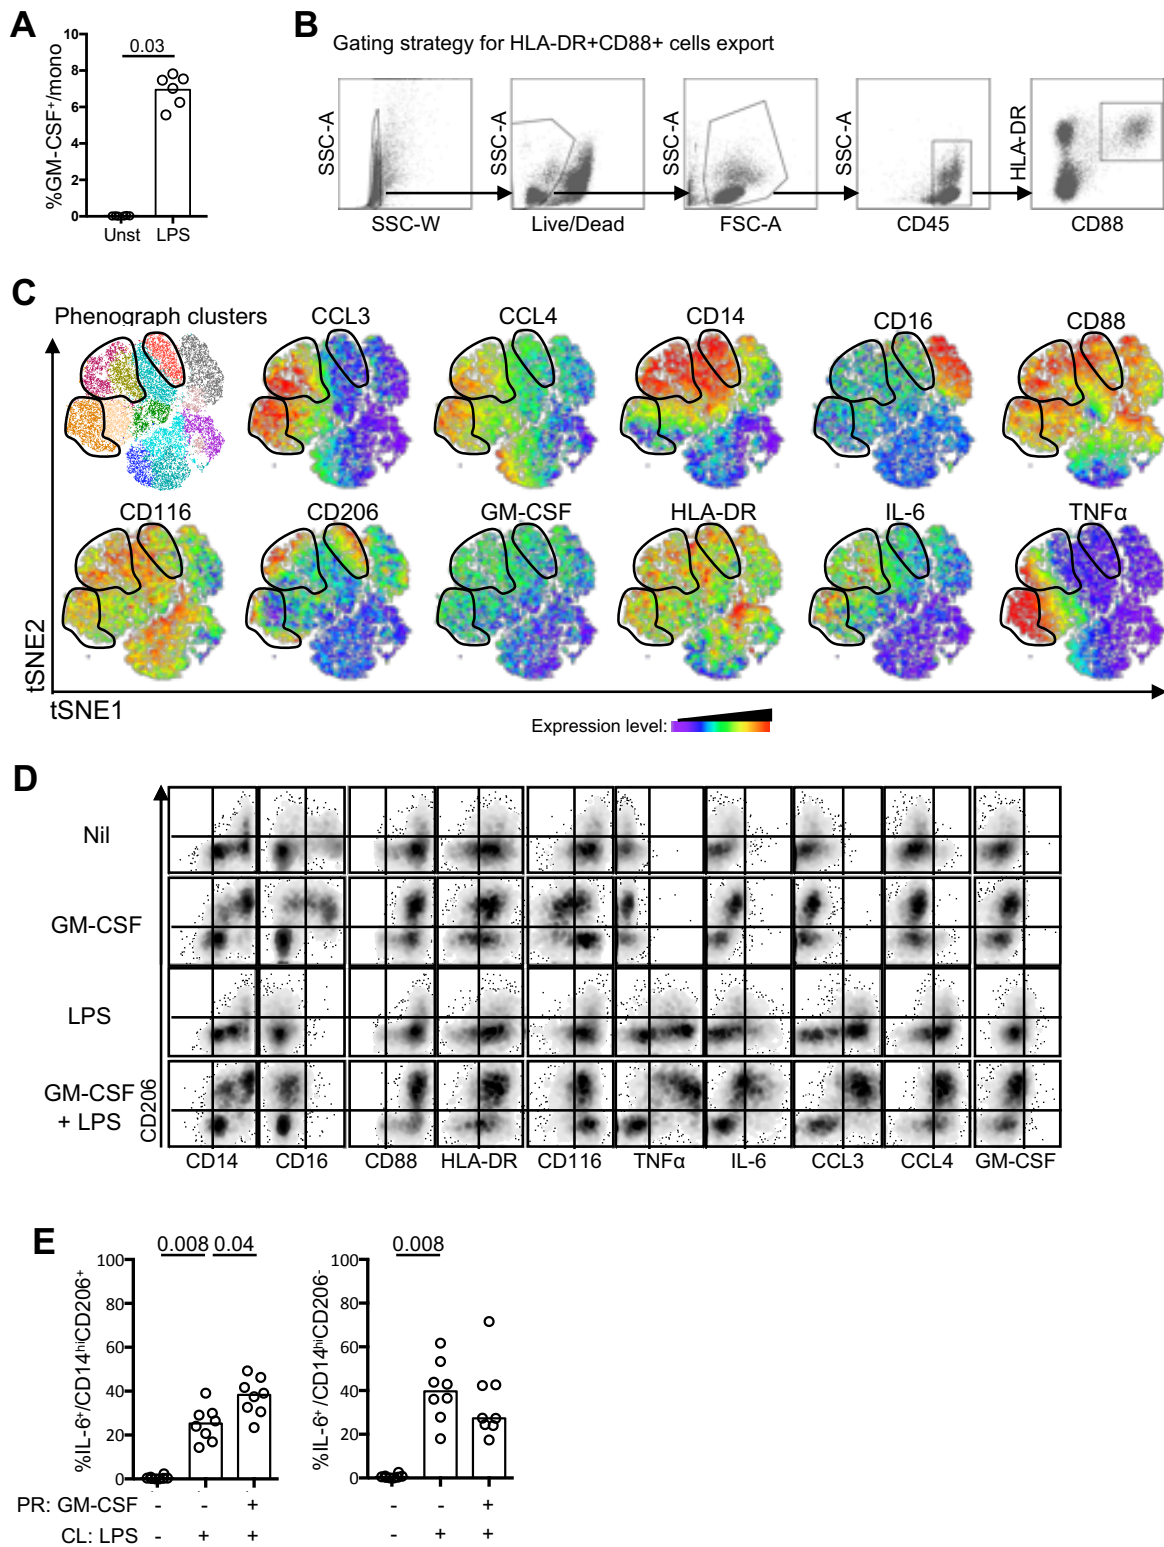

**Fig. S3.** (A) Intracellular cytokine staining of GM-CSF in human peripheral blood monocytes stimulated or not with LPS. (B) Gating strategy to define single live CD45<sup>+</sup>HLA-DR<sup>+</sup>CD88<sup>+</sup> cells.

(C) Concatenated tSNE dot plot with PhenoGraph-defined cell clusters overlaid (upper left) and expression heatmaps of various myeloid markers, cytokines and chemokines of single live CD45<sup>+</sup>HLA-DR<sup>+</sup>CD88<sup>+</sup> cells from healthy human peripheral blood. (D) Density plots of CD45<sup>+</sup>HLA-DR<sup>+</sup>CD88<sup>+</sup> cells from healthy human peripheral blood following 24hr priming with or without GM-CSF and subsequent challenge with LPS. The expression of CD206 (y-axis) and various myeloid markers, cytokines and chemokines (x-axis) are shown. (E) Frequency of IL-6<sup>+</sup> cells among CD14<sup>hi</sup>CD206<sup>+</sup> (left panel) or CD14<sup>hi</sup>CD206<sup>-</sup> (right panel) cells from healthy human PBMCs (n=8) primed (PR) with or without GM-CSF for 24hrs and subsequently challenged (CL) with LPS (10ng/mL) for 6hrs.

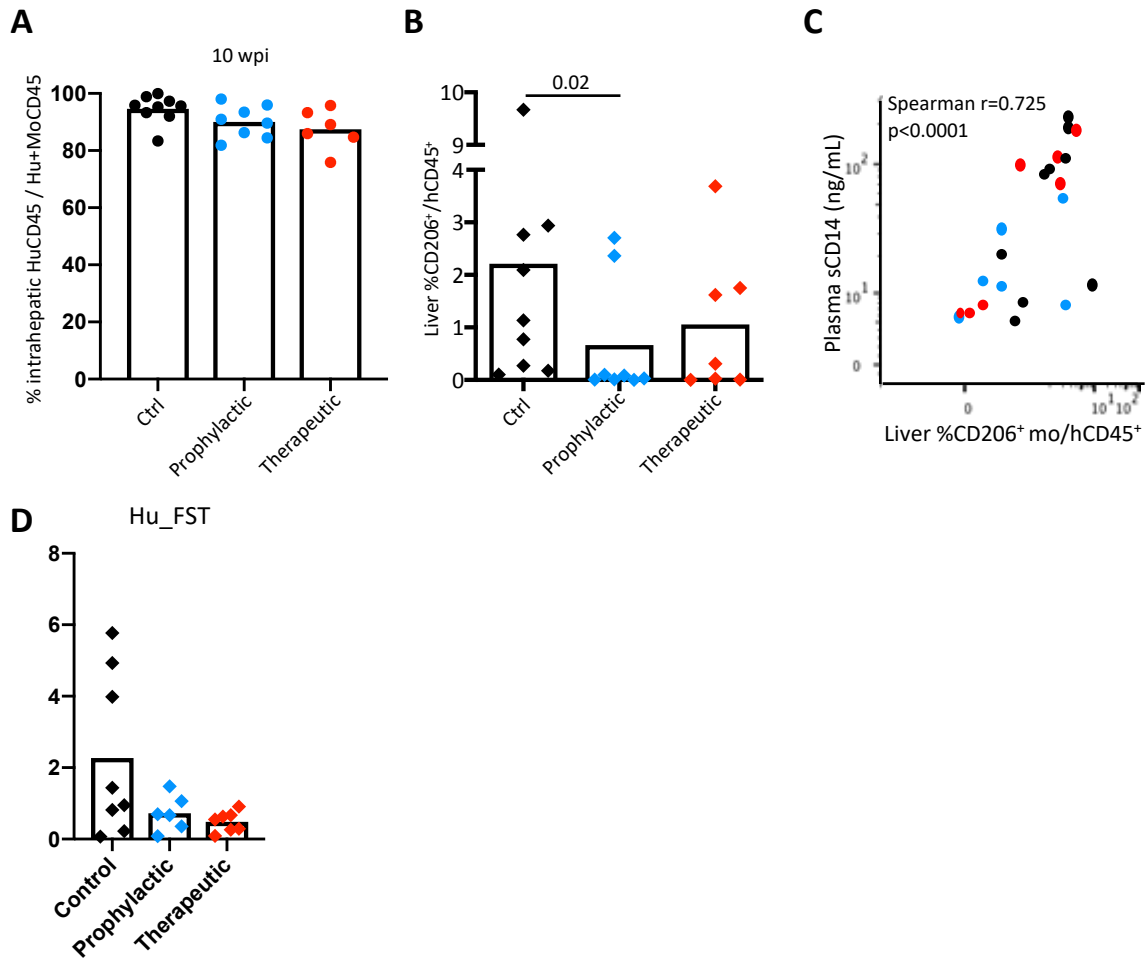

**Fig. S4.** (A) Frequencies of chimerism [% huCD45<sup>+</sup> cells among total blood mononuclear cells (Human + mouse CD45<sup>+</sup> cells)], in the liver of HIL mice at the end of the experiment [10 weeks post-infection (wpi)] (n=23 mice). (B) Frequency among total human CD45<sup>+</sup> cells of intrahepatic CD14<sup>+</sup>HLA-DR<sup>hi</sup>CD206<sup>+</sup> macrophages in HBV-infected mice at 10 wpi that were untreated (n=9) or that received anti-GM-CSF antagonistic antibody at 0 wpi (prophylactic group, n=8) or at 6 wpi (therapeutic group, n=7). (C) Correlative analysis of serum sCD14 concentrations and intrahepatic CD14<sup>+</sup>HLA-DR<sup>hi</sup>CD206<sup>+</sup> cell frequency in HBV-infected humanised mice untreated or treated with anti-GM-CSF antibody (total n=24) by Spearman's rank correlation coefficient (black, Ctrl; blue, prophylactic; red, therapeutic). (D) Expression of the human pro-fibrotic gene FST within HIL mouse livers at 10 wpi relative to the human albumin (ALB) gene.

## Supplementary tables

**Table S1. Antibodies used for immunohistochemical (IHC) labelling of liver tissue sections**

| Antibody     | Clone      | Cat. Number | Provider         | dilution | Source | Labelling cell compartment |
|--------------|------------|-------------|------------------|----------|--------|----------------------------|
| Cytokeratin  | EPR1626    | ab133263    | Abcam            | 1:100    | Rabbit | Cytoplasm and Membrane     |
| CD206        | 43146      | MCA2155T    | AbD Serotec      | 1:200    | Mouse  | Cytoplasm and Membrane     |
| CD14         | EPR3653    | Ab133335    | Abcam            | 1:500    | Rabbit | Cytoplasm and Membrane     |
| TNF $\alpha$ | polyclonal | ab6671      | Abcam            | 1:50     | Rabbit | Cytoplasm and Membrane     |
| GM-CSF       | OTI8G5     | NBP2-46364  | Novus Biological | 1:50     | Mouse  | Cytoplasm and Membrane     |

**Table S2. List of primer sequences used for real time PCR**

| Targets          | Forward Sequence        | Reverse sequence         |
|------------------|-------------------------|--------------------------|
| hIGFBP-5         | GAAGCAGTGAAGAAGGACCG    | GAATCCTTTGCGGTCACAAT     |
| h $\alpha$ -SMA  | AGGCACCCCTGAACCCCAA     | CAGCACCGCCTGGATAGCC      |
| hCOL1 $\alpha$ 1 | GGCTTCCCTGGTCTTCCTGG    | CCAGGGGGTCCAGCCAAT       |
| hTGF $\beta$ 1   | CGCTAAGGCGAAAGCCCTCAATT | ACAATTCCTGGCGATACCTCAGCA |
| hFST             | TGTGGTGGACCAGACCAATA    | CCGAAATGGAGTTGCAAGAT     |
| hALB             | GCACAGAATCCTTGGTGAACAG  | ATGGAAGGTGAATGTTTTCAGCA  |
