# Supplementary material for: Liver fibrosis and CD206+ macrophage accumulation are suppressed by anti-GM-CSF therapy
Source: PubMed Central journal article supplement — JHEP Rep. 2019 Dec 6;2(1):100062. doi: 10.1016/j.jhepr.2019.11.006 (PMC7005658; doi:10.1016/j.jhepr.2019.11.006), 2019-12-06
Supplement: mmc2.pdf [file mmc2.pdf]

## Journal of Hepatology CTAT methods

Tables for a “Complete, Transparent, Accurate and Timely account” (CTAT) are now mandatory for all revised submissions. The aim is to enhance the reproducibility of methods.

- Only include the parts relevant to your study
- Refer to the CTAT in the main text as ‘Supplementary CTAT Table’
- Do not add subheadings
- Add as many rows as needed to include all information
- Only include one item per row

**If the CTAT form is not relevant to your study, please outline the reasons why:**

|  |
|--|
|  |
|--|

### 1.1 Antibodies

| Name                | Citation | Supplier         | Cat no.    | Clone no.  |
|---------------------|----------|------------------|------------|------------|
| Cytokeratin-18      |          | Abcam            | ab133263   | EPR1626    |
| CD206               |          | AbD Serotec      | MCA2155T   | 43146      |
| CD14                |          | Abcam            | Ab133335   | EPR3653    |
| TNF $\alpha$        |          | Abcam            | ab6671     | polyclonal |
| GM-CSF              |          | Novus Biological | NBP2-46364 | OT18G5     |
| CD14-PE/Cy7         |          | BD biosciences   | 557742     | M5E2       |
| CD14-BV650          |          | BD biosciences   | 563420     | M5E2       |
| CD45-V500           |          | BD biosciences   | 560777     | HI30       |
| CD206-PE/CF594      |          | BD biosciences   | 564063     | 19.2       |
| CD206-BUV395        |          | BD biosciences   | 740309     | 19.2       |
| TNF $\alpha$ -PE    |          | BD biosciences   | 554513     | Mab11      |
| TNF $\alpha$ -AF700 |          | BD biosciences   | 557996     | Mab11      |
| CCL4-APC/H7         |          | BD biosciences   | 561280     | D21-1351   |
| GM-CSF-PE/CF594     |          | BD biosciences   | 562857     | BVD2-21C11 |
| IL-6-BV421          |          | BD biosciences   | 563279     | MQ2-13A5   |
| CD3-FITC            |          | Biolegend        | 300406     | UCHT1      |
| CD20-FITC           |          | Biolegend        | 302304     | 2H7        |
| CD16-BV711          |          | Biolegend        | 302044     | 3G8        |
| CD56-FITC           |          | eBioscience      | 11-0569-42 | MEM188     |
| HLA-DR-BV785        |          | Biolegend        | 307642     | L243       |

# JOURNAL OF HEPATOLOGY

|                        |  |                        |             |                |
|------------------------|--|------------------------|-------------|----------------|
| CD116-PE/Vio770        |  | Miltenyi biotec        | 130-101-025 | REA211         |
| CCL3-FITC              |  | R&D Systems            | MA5-23564   | 93342          |
| CD88-PE                |  | Exbio                  | 1P-736-T100 | S5/1           |
| CD3-BV650              |  | BD biosciences         | 563916      | SP34-2         |
| CD5-BV711              |  | BD biosciences         | 563170      | UCHT2          |
| CD14-AF700             |  | BD biosciences         | 557923      | M5E2           |
| CD19-BV650             |  | BD biosciences         | 563780      | 2H7            |
| CD20-BV650             |  | BD biosciences         | 563226      | SJ25C1         |
| CD45RA-FITC            |  | BD biosciences         | 556626      | 5H9            |
| CD169-PE               |  | BD biosciences         | 565248      | 7-239          |
| Streptavidin-BUV737    |  | BD biosciences         | 564293      |                |
| CD1c-BV421             |  | Biolegend              | 331526      | L161           |
| CD16-APC/Cy7           |  | Biolegend              | 302018      | 3G8            |
| CD88-PercP/Cy5.5       |  | Biolegend              | 344312      | S5/1           |
| CD88-PE/Cy7            |  | Biolegend              | 344308      | S5/1           |
| CD163-BV605            |  | Biolegend              | 333615      | GHI/61         |
| FceRIa-PercP           |  | Biolegend              | 334616      | AER-37 (CRA-1) |
| Anti-mouse CD45-biotin |  | eBioscience            | 13-0451-82  | 30-F11         |
| CADM1                  |  | MBL                    | CM004-3     | 3E1            |
| Anti-chicken IgY-AF647 |  | Jackson Immunoresearch | 703-606-155 | NA             |

## 1.2 Cell lines

| Name | Citation | Supplier | Cat no. | Passage no. | Authentication test method |
|------|----------|----------|---------|-------------|----------------------------|
| NA   |          |          |         |             |                            |

## 1.3 Organisms

| Name           | Citation | Supplier               | Strain | Sex           | Age               | Overall n number |
|----------------|----------|------------------------|--------|---------------|-------------------|------------------|
| Humanised mice |          | The Jackson Laboratory | NSG    | Male & Female | 12 – 28 weeks old | 55               |

## 1.4 Sequence based reagents

| Name | Sequence | Supplier |
|------|----------|----------|
| NA   |          |          |

## 1.5 Biological samples

| Description      | Source       | Identifier |
|------------------|--------------|------------|
| Liver tissue     | Human, mouse |            |
| Peripheral blood | Human, mouse |            |

## 1.6 Deposited data

| Name of repository | Identifier | Link |
|--------------------|------------|------|
| NA                 |            |      |

## 1.7 Software

| Software name  | Manufacturer           | Version |
|----------------|------------------------|---------|
| FACS Diva      | BD biosciences         | 7       |
| FlowJo         | Tree Star Inc.         | 10      |
| Graphpad Prism | GraphPad Software Inc. | 6.0     |
| inForm         | PerkinElmer, Inc.      | 2.3     |
|                |                        |         |

## 1.8 Other (e.g. drugs, proteins, vectors etc.)

| Penicillin G Sodium  | Sigma |  |
|----------------------|-------|--|
| Streptomycin sulfate | Sigma |  |
|                      |       |  |
|                      |       |  |

## 1.9 Please provide the details of the corresponding methods author for the manuscript:

|                          |
|--------------------------|
| Charles-Antoine Dutertre |
|--------------------------|

## 2.0 Please confirm for randomised controlled trials all versions of the clinical protocol are included in the submission. These will be published online as supplementary information.

|    |
|----|
| NA |
|----|
